# Supplementary material for: Human local adaptation of the TRPM8 cold receptor along a latitudinal cline
Source: PubMed Central journal article supplement (PMC5933706; doi:10.1371/journal.pgen.1007298), 2018-05-03

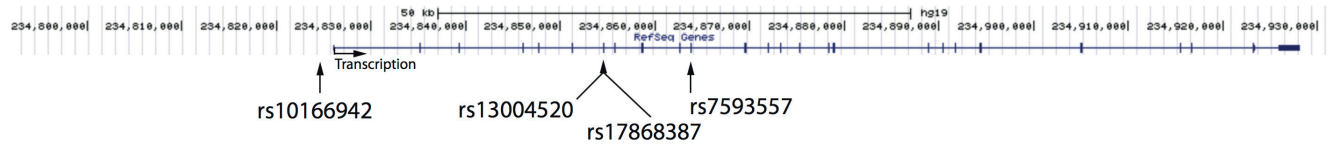

Supplement: pgen.1007298.s002.pdf [file pgen.1007298.s002.pdf]
